# Supplementary material
Source: PubMed Central journal article supplement (PMC4333259)
Supplement: Supp_Figure1.pdf [file Supp_Figure1.pdf]

## Supplementary Data

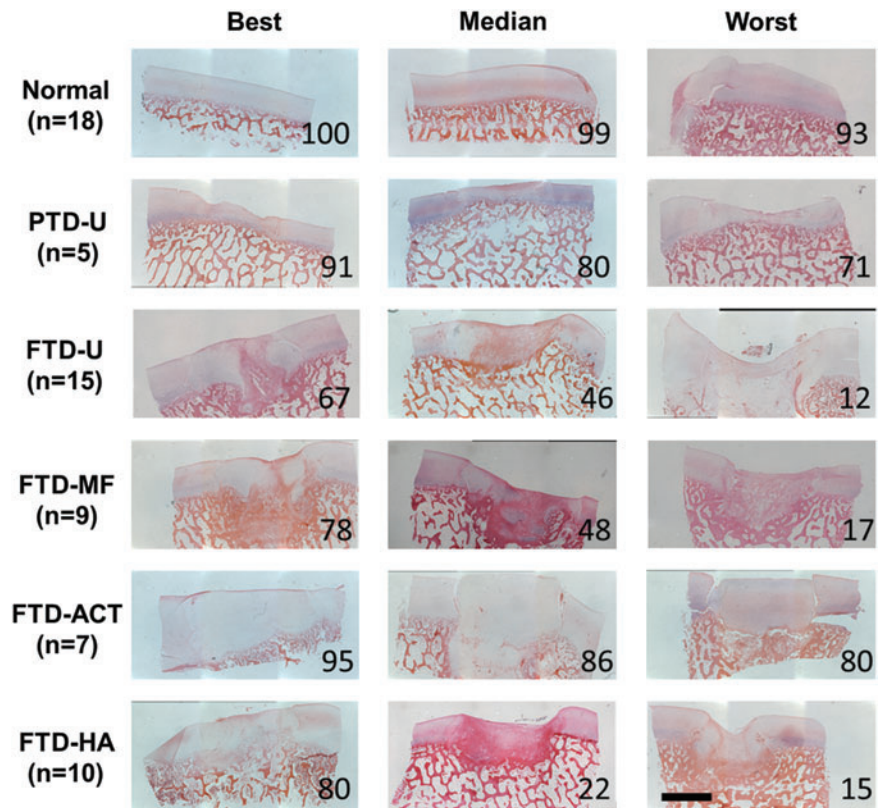

**SUPPLEMENTARY FIG. S1.** Histological evaluation of partial- or full-thickness cartilage defects and treatment with microfracture or replacement with articular cartilage. Staining (hematoxylin and eosin) for cells and matrix. Numbers represent overall histological score for that specimen from ICRS-II scoring (scale bar=2 mm). ACT, autologous cartilage transfer; FTD, full-thickness defect; HA, hyaluronic acid; MF, microfracture; PTD, partial-thickness defect; U, untreated.
