# Supplementary material
Source: PubMed Central journal article supplement (PMC4333259)
Supplement: Supp_Figure2.pdf [file Supp_Figure2.pdf]

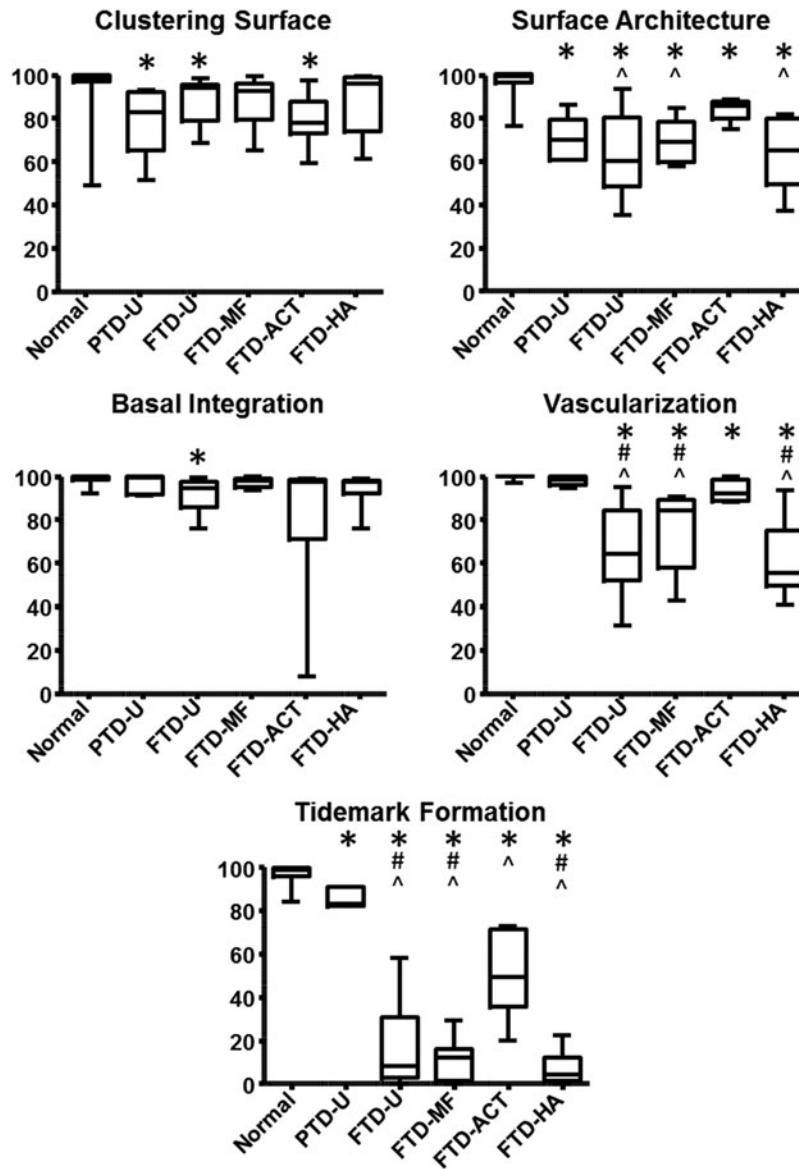

**SUPPLEMENTARY FIG. S2.** Additional histological scoring categories for all treatment groups based on the ICRS-II scoring system (100=best, 0=worst, \* $p < 0.05$  vs. normal, # $p < 0.05$  vs. PTD-U, and ^ $p < 0.05$  vs. FTD-ACT).
