# Supplementary material
Source: PubMed Central journal article supplement (PMC4333259)
Supplement: Supp_Figure3.pdf [file Supp_Figure3.pdf]

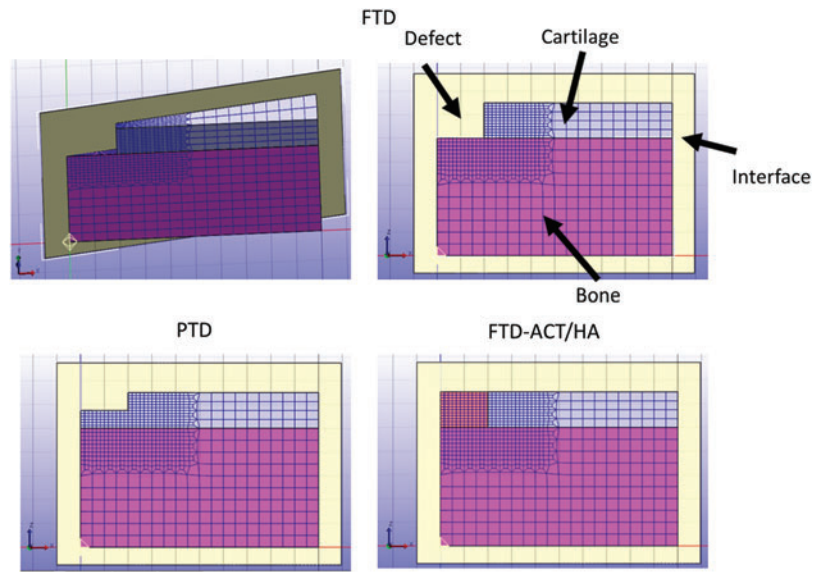

**SUPPLEMENTARY FIG. S3.** Finite element model geometry showing defect, cartilage, bone, and replacement materials for the various experimental groups.
